# Supplementary material
Source: Springer Nature journal article supplement (https://www.springermedizin.de/resource/supplementary/12885_2011_2971_MOESM8_ESM.pdf/9462352)
Supplement: MOESM8 [file 9462352]

24 h → 48 h →

Control 75 100 125 Control 75 100 125  
 1 0.9 0.6 0.13 1 0.43 0.07 0.02

Magnolol concentration in  $\mu\text{M}$

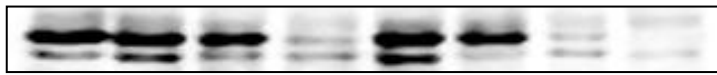

Cyclin B1

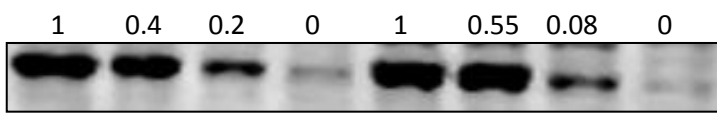

Cyclin A

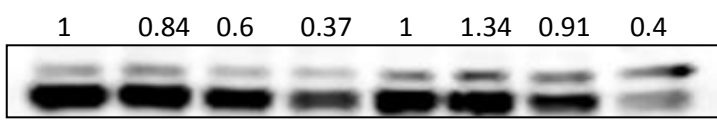

CDK-2

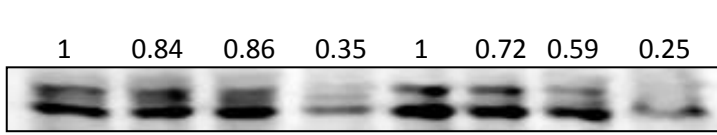

CDK-4

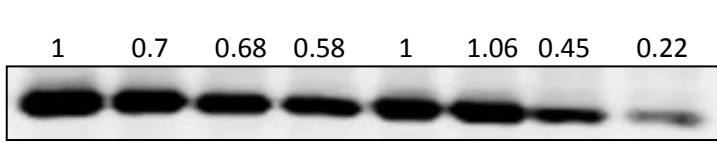

Cdc2p34

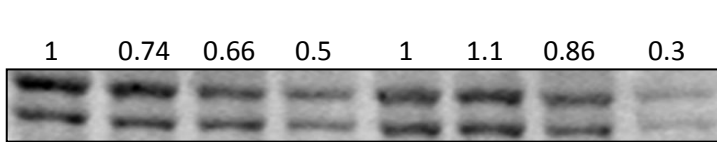

Cdc25A

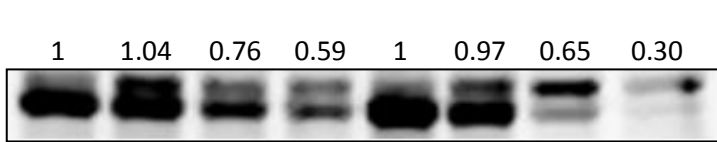

Cdc25 C

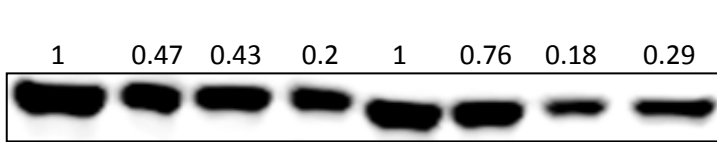

p-cdc25 C

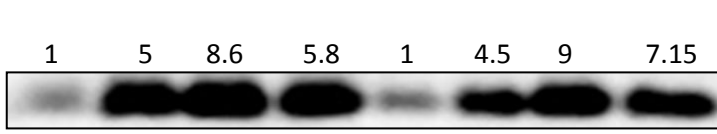

p21

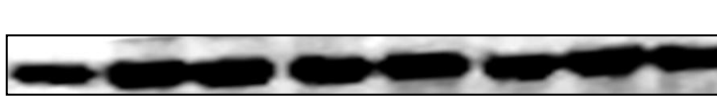

$\beta$ -Actin
